# Supplementary material
Source: HighWire-hosted journal article supplement (https://cmaj.ca/highwire/filestream/58433/field_highwire_adjunct_files/0/diabetes-tobe-online_appendix_1.pdf)

**Appendix 1:** Algorithm for the management of dyslipidemia in patients with diabetes used in the Diabetes Risk Evaluation and Microalbuminuria (DREAM 3) study. Note: LDL = low-density lipoprotein, trig = triglycerides, HDL = high-density lipoprotein. **Part A:** Patients with LDL cholesterol  $\geq 2.5$  mmol/L. **Part B:** Patients with normal LDL cholesterol level ( $< 2.5$  mmol/L).

**Part A**

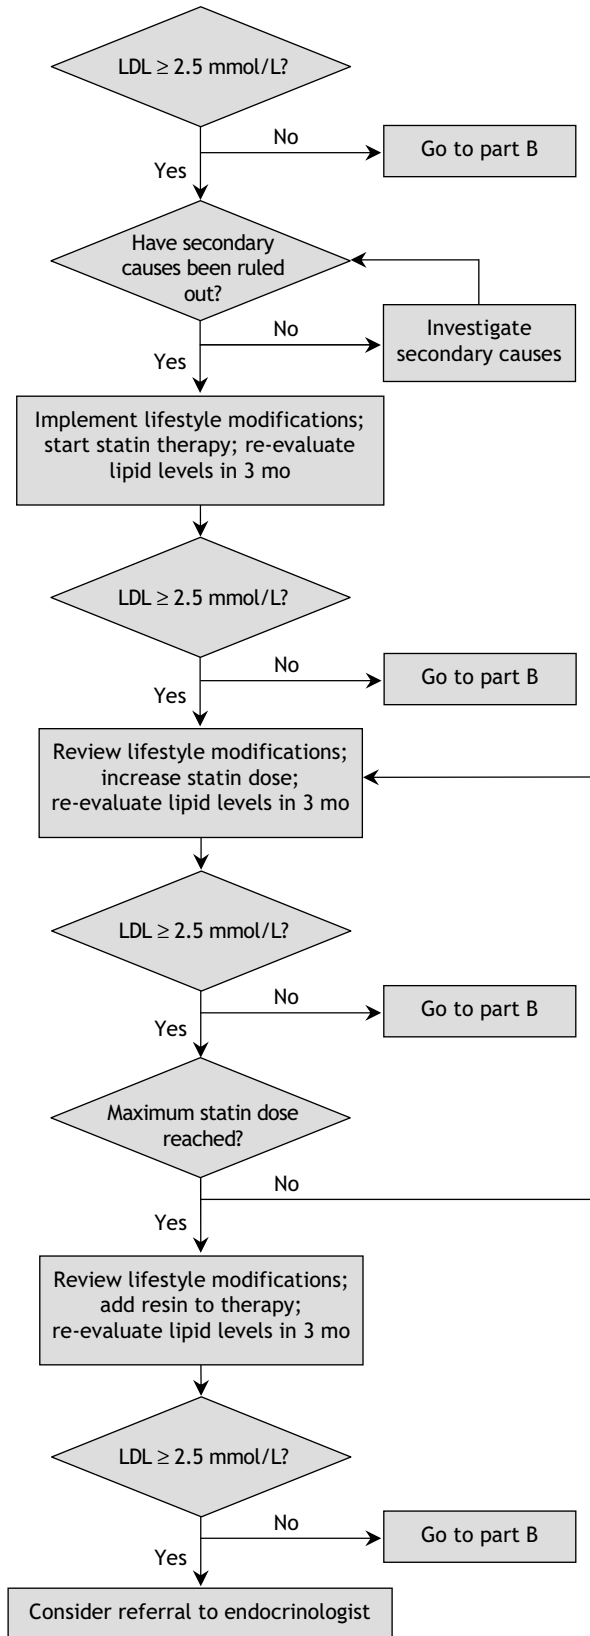

**Part B: Patients with LDL < 2.5 mmol/L**

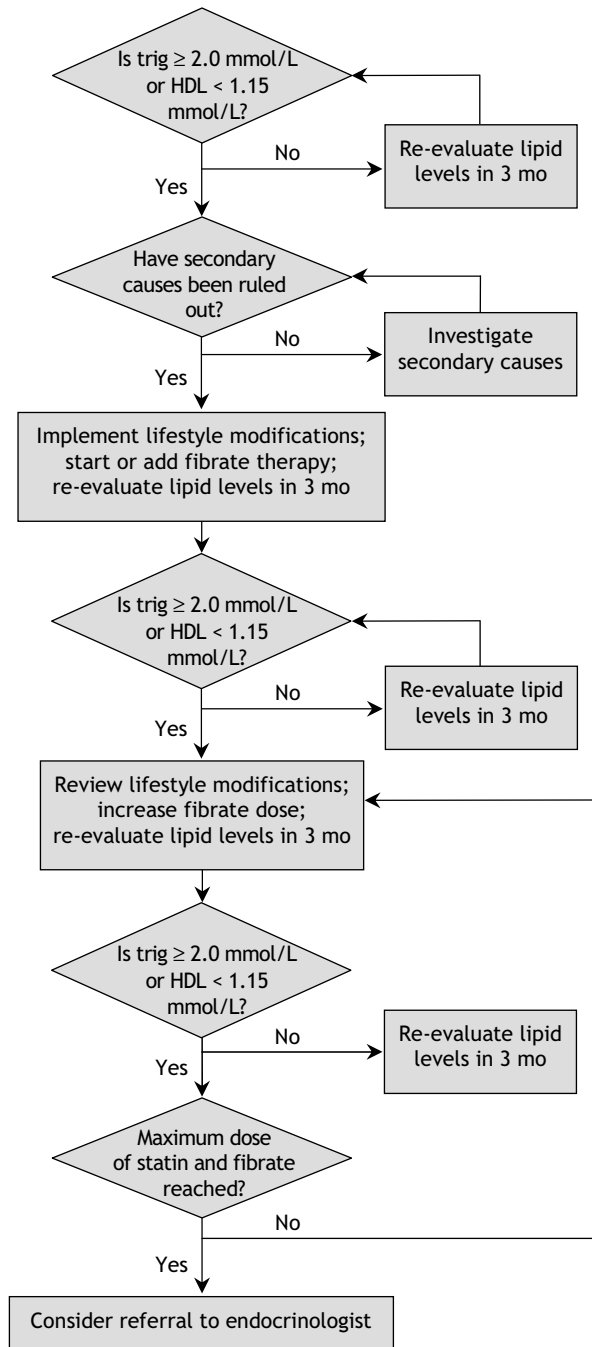

Supplement: diabetes-tobe-online_appendix_1.pdf [file diabetes-tobe-online_appendix_1.pdf]
